# Supplementary material
Source: PubMed Central journal article supplement (PMC4815444)
Supplement: hdy201529x1.pdf [file hdy201529x1.pdf]

## Supplementary Figure 1

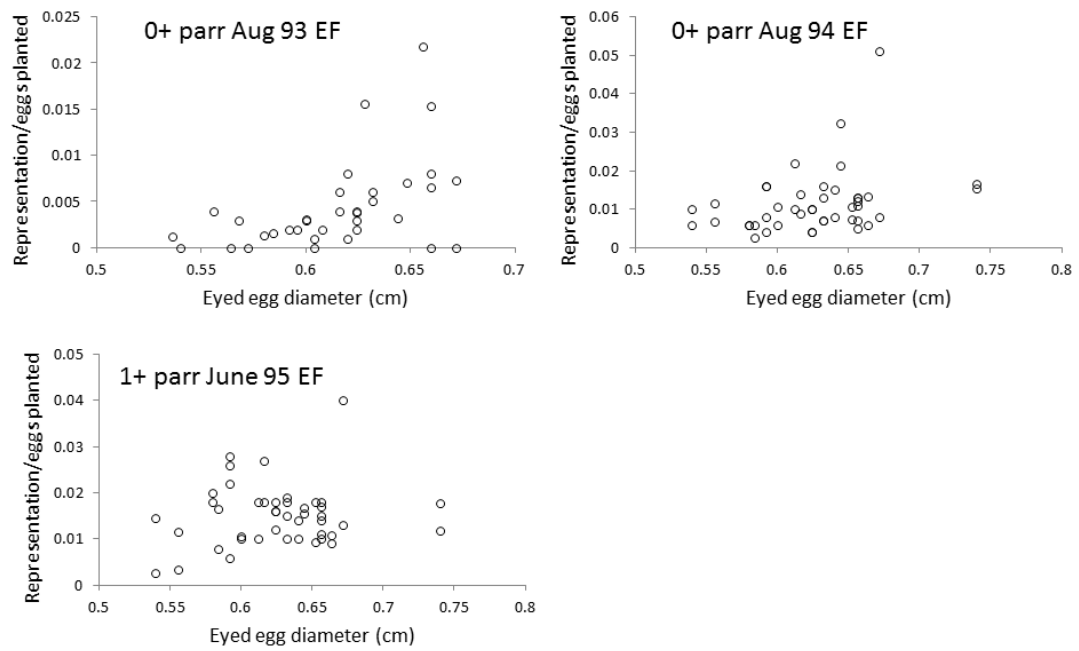

Fig.S1 Representation (scaled by the number of eyed-eggs planted per family) as a function of egg size for (a) 0+ parr from the 1993 cohort electrofished in August 1993, (b) 0+ parr from the 1994 cohort electrofished in August 1994 and (c) 1+ parr from the 1994 cohort electrofished in June 1995.
