# Supplementary material
Source: PubMed Central journal article supplement (PMC4815444)
Supplement: hdy201529x2.pdf [file hdy201529x2.pdf]

Supplementary Figure 2

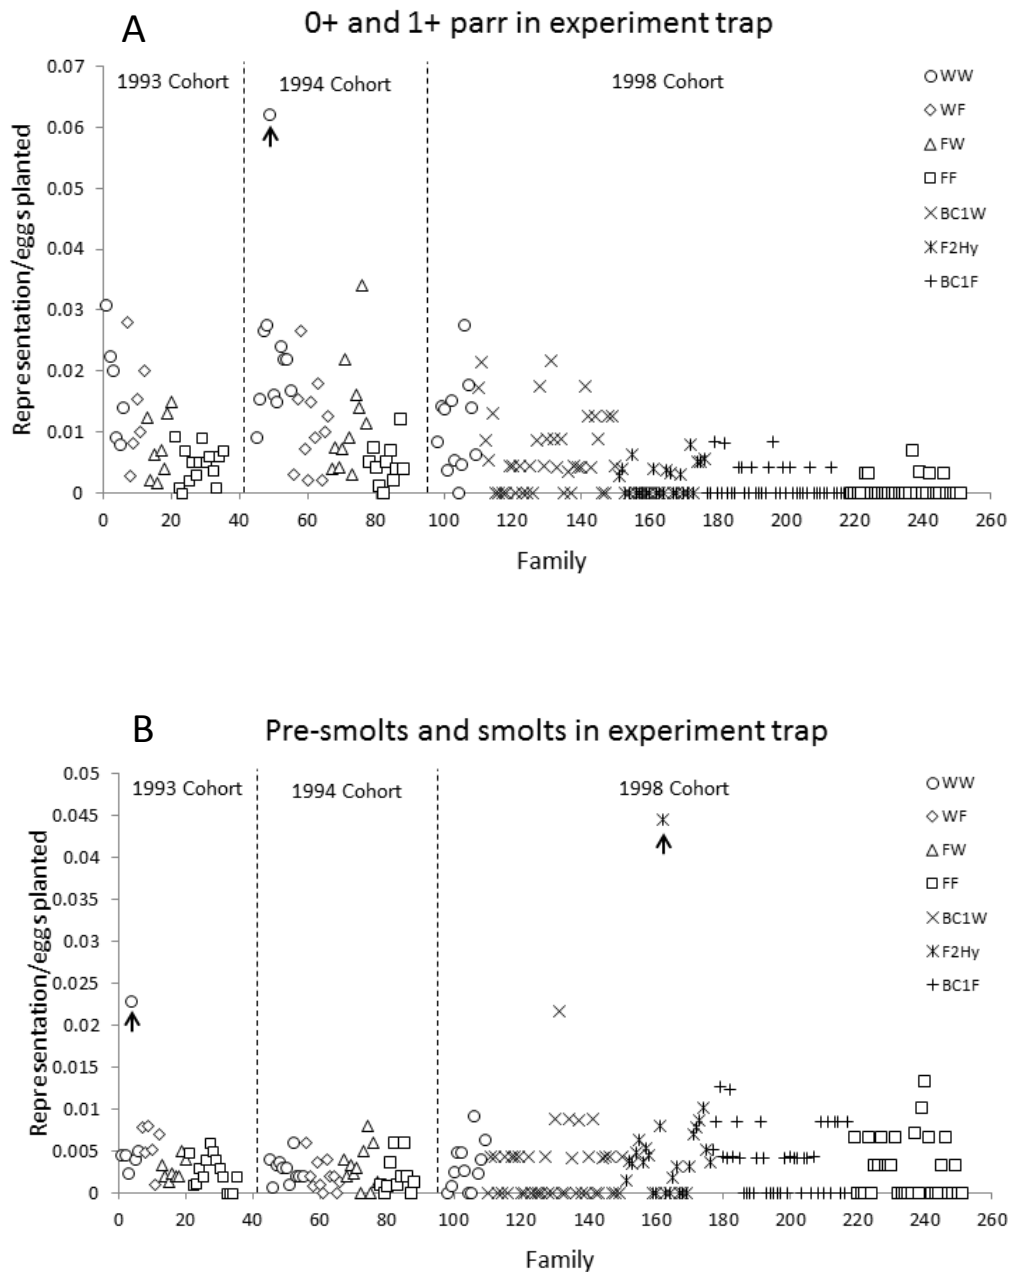

Fig.S2 (a) Representation of 0+ and 1+ parr in the experiment-trap samples for the 1993, 1994 and 1998 cohorts, scaled by the number of eyed-eggs planted per family. (b) Representation (scaled by eggs planted) of pre-smolts and smolts in the experiment-trap samples for the 1993, 1994 and 1998 cohorts. Families are labelled arbitrarily in each panel and correspond between (a) and (b). Arrows indicate outlier families.
