# Supplementary material
Source: PubMed Central journal article supplement (PMC4815444)
Supplement: hdy201529x3.pdf [file hdy201529x3.pdf]

Supplementary Figure 3

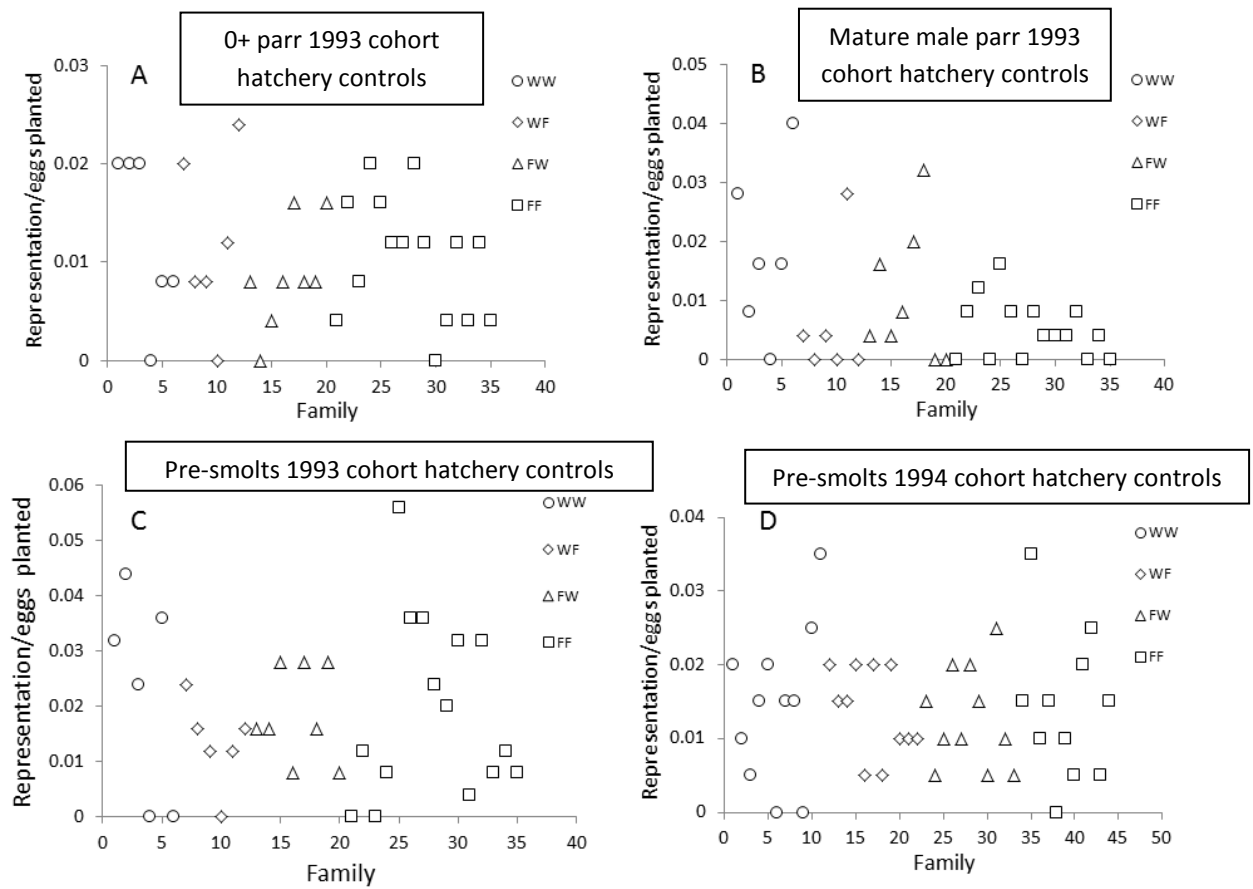

Fig.S3 Representation of (a) 0+ parr, (b) mature male parr and (c) pre-smolts in the hatchery control samples for the 1993 cohort and (d) pre-smolts in the hatchery control samples for the 1994 cohort. Representation is scaled in each case by the number of eyed eggs retained in the hatchery per family.
