# Supplementary material
Source: PubMed Central journal article supplement (PMC4815444)
Supplement: hdy201529x4.pdf [file hdy201529x4.pdf]

Supplementary Figure 4

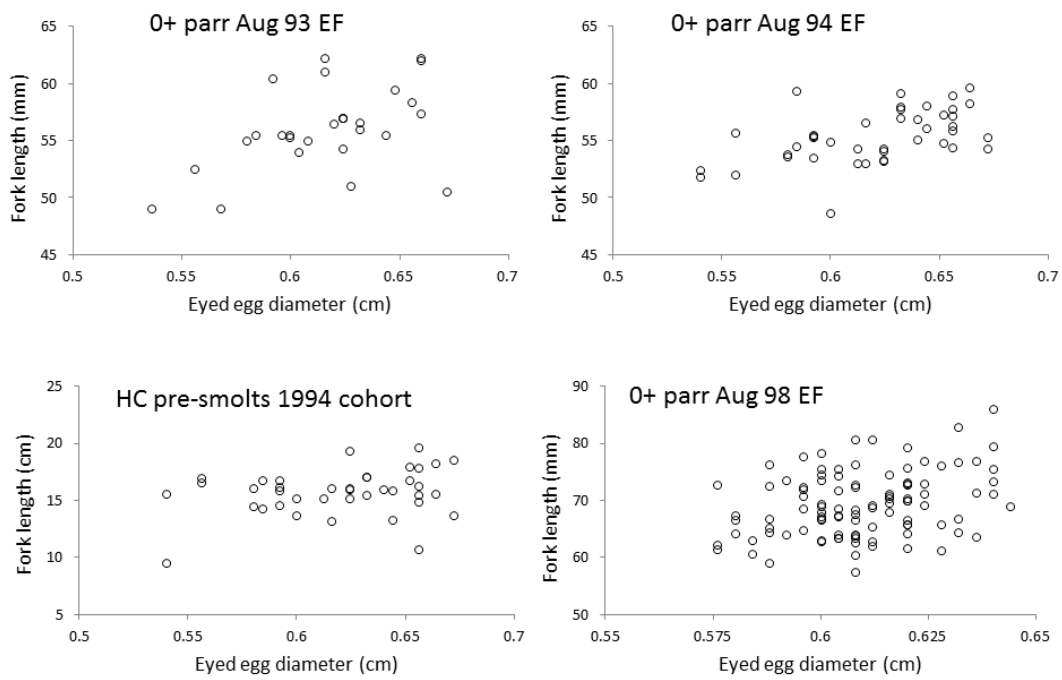

Fig.S4 Fork length as a function of egg size for (a) 0+ parr from the 1993 cohort electrofished in August 1993, (b) 0+ parr from the 1994 cohort electrofished in August 1994, (c) hatchery control pre-smolts from the 1994 cohort and (d) 0+ parr from the 1998 cohort electrofished in August 1998.
