# Supplementary material
Source: PubMed Central journal article supplement (PMC4815444)
Supplement: hdy201529x5.pdf [file hdy201529x5.pdf]

Supplementary Figure 5

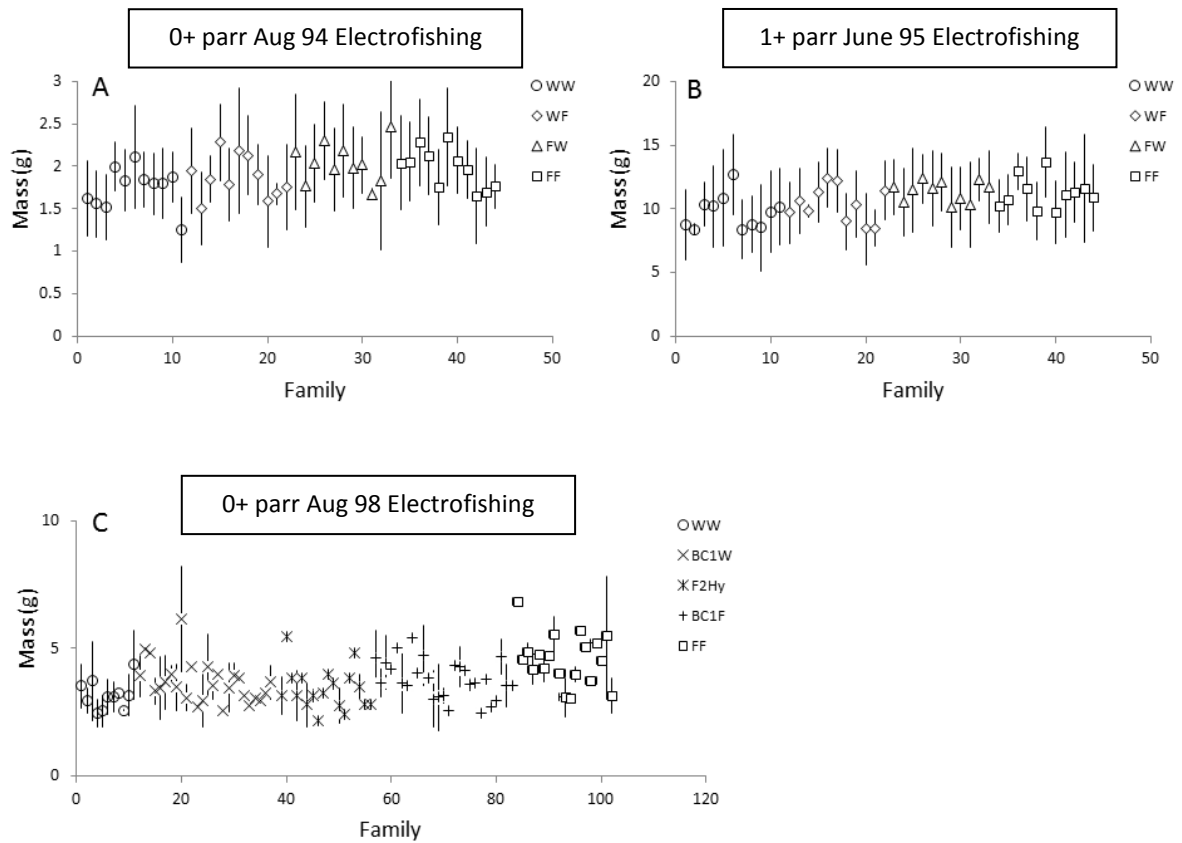

Fig.S5 Mass of (a) 0+ parr in August 1994 electrofishing sample (1994 cohort) (b) 1+ parr in June 1995 electrofishing sample (1994 cohort), and (c) 0+ parr in August 1998 electrofishing sample (1998 cohort). Error bars are standard deviations around the mean per family.
