# Supplementary material
Source: PubMed Central journal article supplement (PMC4815444)
Supplement: hdy201529x6.pdf [file hdy201529x6.pdf]

### Supplementary Figure 6

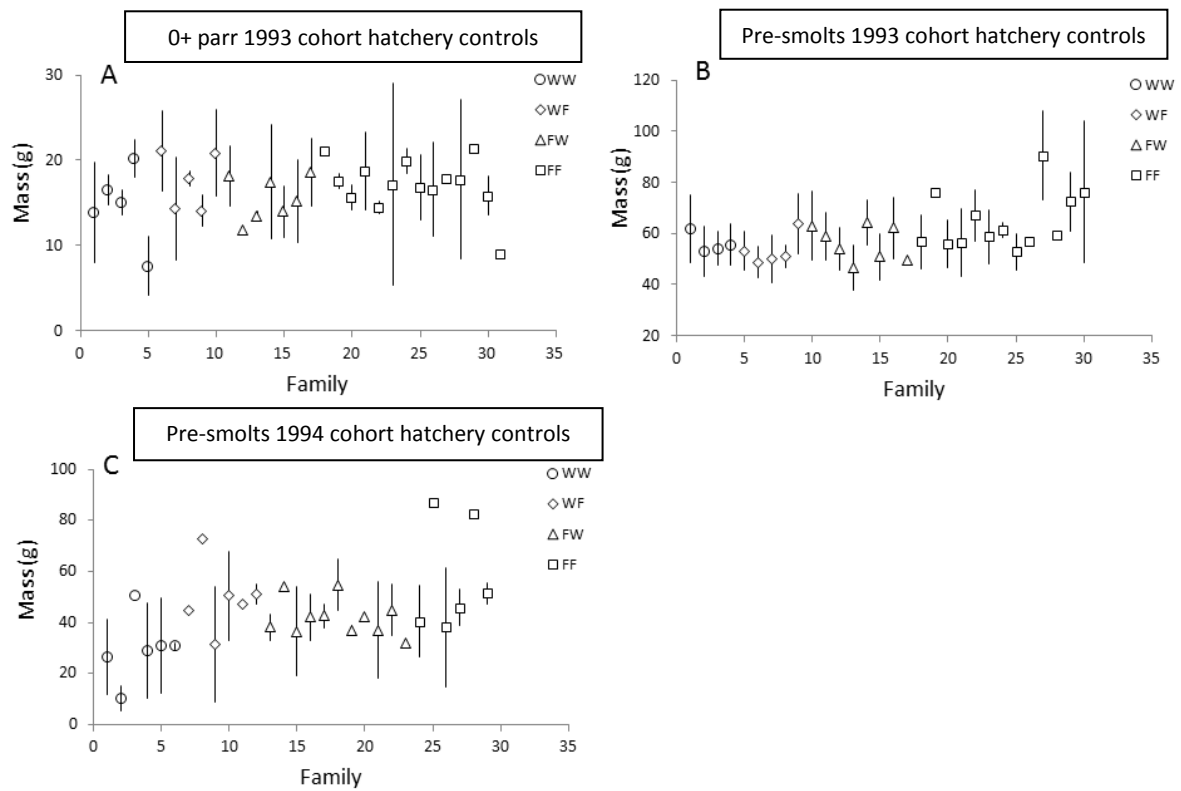

Fig.S6 Mass of (a) 0+ parr in August 1993 hatchery control sample (1993 cohort), (b) pre-smolts in March 1994 hatchery control sample (1993 cohort), and (c) pre-smolts in March 1995 hatchery control sample (1994 cohort). Error bars are standard deviations around the mean per family.
