# Supplementary material
Source: PubMed Central journal article supplement (PMC4815444)
Supplement: hdy201529x7.pdf [file hdy201529x7.pdf]

Mating design for 1998 cohort. W = wild parent. F = farm parent. F1H = F<sub>1</sub> hybrid. Sires are listed horizontally and dams are listed vertically. X denotes a mating.

|             | Sire ID→           | 114 | 115 | 116 | 117 | 118 | 119 | 120 | 121 | 122 | 123 | 124 | 125 |
|-------------|--------------------|-----|-----|-----|-----|-----|-----|-----|-----|-----|-----|-----|-----|
| Dam ID<br>↓ | Dam/Sire<br>Origin | W   | W   | W   | W   | W   | F1H | F1H | F   | F   | F   | F   | F   |
| 89          | W                  | X   |     | X   | X   |     |     |     |     |     |     |     |     |
| 90          | W                  | X   | X   |     |     | X   |     |     |     |     |     |     |     |
| 91          | W                  |     | X   | X   |     | X   |     |     |     |     |     |     |     |
| 92          | W                  |     |     | X   | X   | X   |     |     |     |     |     |     |     |
| 93          | F1H                | X   | X   |     | X   |     | X   | X   |     | X   | X   | X   |     |
| 94          | F1H                |     |     | X   | X   | X   | X   | X   | X   | X   |     |     | X   |
| 95          | F1H                |     | X   | X   |     | X   | X   | X   | X   |     |     | X   | X   |
| 96          | F1H                | X   | X   |     | X   |     | X   |     |     | X   | X   | X   |     |
| 97          | F1H                | X   |     | X   | X   |     | X   | X   | X   | X   | X   |     |     |
| 98          | F1H                | X   | X   |     |     | X   | X   | X   |     |     | X   | X   | X   |
| 99          | F1H                | X   | X   |     | X   |     | X   | X   |     | X   | X   | X   |     |
| 100         | F1H                | X   | X   |     |     | X   | X   | X   |     |     | X   | X   | X   |
| 101         | F1H                |     |     | X   | X   | X   | X   |     | X   | X   |     |     | X   |
| 102         | F1H                |     | X   | X   |     | X   | X   | X   | X   |     |     | X   | X   |
| 103         | F1H                | X   |     | X   | X   |     | X   | X   | X   | X   | X   |     |     |
| 104         | F1H                |     | X   | X   |     | X   | X   | X   | X   |     |     | X   | X   |
| 105         | F1H                |     | X   |     |     | X   | X   | X   |     |     | X   | X   | X   |
| 106         | F1H                |     |     | X   | X   | X   | X   | X   | X   | X   |     |     | X   |
| 107         | F                  |     |     |     |     |     |     |     | X   |     |     | X   | X   |
| 108         | F                  |     |     |     |     |     |     |     | X   | X   | X   | X   | X   |
| 109         | F                  |     |     |     |     |     |     |     | X   | X   | X   | X   | X   |
| 110         | F                  |     |     |     |     |     |     |     | X   | X   | X   | X   | X   |
| 111         | F                  |     |     |     |     |     |     |     | X   | X   | X   | X   | X   |
| 112         | F                  |     |     |     |     |     |     |     | X   | X   | X   | X   | X   |
| 113         | F                  |     |     |     |     |     |     |     | X   | X   | X   | X   | X   |
