# Supplementary material
Source: PubMed Central journal article supplement (PMC4815444)
Supplement: hdy201529x8.pdf [file hdy201529x8.pdf]

**Supplementary Table 2** Full fixed effects results from the representation GLMMs. For egg size effect, + signifies a positive effect and the *P* value associated with this effect is given in parentheses. WW = pure wild group. Cohort refers to year of egg-hatching, not of egg fertilisation. ‘Sample’ column provides information on the collection method/environment (e.g. electrofishing), the time of sampling (e.g. Aug 1993) and the life stage sampled (e.g. 0+ parr). Total n = total number of individuals sampled. Egg size column gives direction of effect on representation (+ or -) plus *P*-value in parentheses. Overall group effect refers to whether it was significant ( $P < 0.05$ ) or not, with *P*-value given in parentheses when significant.

| Cohort | Sample                                        | Total n | No. families (total) <sup>1</sup> | Egg size effect ( <i>P</i> ) | Overall group effect ( <i>P</i> ) | Groups under-represented relative to WW                                                 | Groups over-represented relative to WW |
|--------|-----------------------------------------------|---------|-----------------------------------|------------------------------|-----------------------------------|-----------------------------------------------------------------------------------------|----------------------------------------|
| 1993   | Electrofishing Aug 1993 0+parr                | 131     | 30(35)                            | + (<0.001)                   | Yes (0.002)                       | None                                                                                    | WF                                     |
| 1994   | Electrofishing Aug 1994 0+parr                | 473     | 44(44)                            | + (<0.001)                   | Yes (0.005)                       | FW, FF                                                                                  | None                                   |
| 1994   | Electrofishing Jun 1995 1+parr                | 603     | 44(44)                            | + (0.042)                    | Yes (0.047)                       | FF                                                                                      | None                                   |
| 1998   | Electrofishing Aug 1998 0+parr                | 242     | 102(154)                          | No                           | Yes (0.049)                       | BC <sub>1</sub> W, F <sub>2</sub> Hy <sup>2</sup> , BC <sub>1</sub> F <sup>2</sup> , FF | None                                   |
| 1993   | Trapped parr May 1993-May 1994                | 303     | 34(35)                            | No                           | Yes (<0.001)                      | FW, FF                                                                                  | None                                   |
| 1993   | Trapped pre-smolts + smolts Sep 1994-Apr 1995 | 124     | 32(35)                            | No                           | Yes (0.022)                       | FW <sup>2</sup> , FF <sup>2</sup>                                                       | None                                   |
| 1994   | Trapped parr May 1994-May 1995                | 521     | 43(44)                            | No                           | Yes (<0.001)                      | WF, FW, FF                                                                              | None                                   |
| 1994   | Trapped pre-smolts + smolts Sep 1995-Apr 1996 | 103     | 39(44)                            | No                           | No                                | None                                                                                    | None                                   |
| 1998   | Trapped parr May 1998-May 1999                | 204     | 68(154)                           | No                           | Yes (<0.001)                      | BC <sub>1</sub> W, F <sub>2</sub> Hy, BC <sub>1</sub> F, FF                             | None                                   |
| 1998   | Trapped pre-smolts + smolts 1998 cohort       | 154     | 87(154)                           | No                           | No                                | None                                                                                    | None                                   |
| 1993   | Hatchery controls 0+parr Aug 1993             | 93      | 31(35)                            | No                           | No                                | None                                                                                    | None                                   |
| 1993   | Hatchery controls mature 0+parr Nov 1993      | 76      | 24(35)                            | No                           | No                                | WF, FF                                                                                  | None                                   |
| 1993   | Hatchery controls pre-smolts Mar 1994         | 163     | 30(35)                            | No                           | No                                | None                                                                                    | None                                   |
| 1994   | Hatchery controls pre-smolts Mar 1995         | 121     | 41(44)                            | No                           | No                                | None                                                                                    | None                                   |

<sup>1</sup>This refers to the number of families represented in the sample, with the total number of original families planted out in parentheses.

<sup>2</sup> *P*-value was marginally non-significant:  $0.05 < P < 0.10$
