# Supplementary material
Source: PubMed Central journal article supplement (PMC4815444)
Supplement: hdy201529x9.pdf [file hdy201529x9.pdf]

**Supplementary Table 3** Variance attributable to random effects of dam and sire in the representation GLMMs. The residual variance in a binomial GLMM fit by the *glmer* function in R is always fixed at  $\pi^2/3$  ( $\approx 3.29$ ). The final two columns give the percentage of the total variation (after conditioning on the fixed effects) that is accounted for dam and sire effects, respectively.

| Cohort | Sample                                           | Dam variance | Sire variance | Residual variance | % explained by dam | % explained by sire |
|--------|--------------------------------------------------|--------------|---------------|-------------------|--------------------|---------------------|
| 1993   | Electrofishing Aug 1993<br>0+parr                | 0.009        | 0.091         | 3.29              | 0.26%              | 2.69%               |
| 1994   | Electrofishing Aug 1994<br>0+parr                | 0.012        | 0.050         | 3.29              | 0.34%              | 1.48%               |
| 1994   | Electrofishing Jun 1995<br>1+parr                | 0.022        | 0.057         | 3.29              | 0.64%              | 1.69%               |
| 1998   | Electrofishing Aug 1998<br>0+parr                | 0.034        | 0.002         | 3.29              | 1.03%              | 0.05%               |
| 1993   | Trapped parr May 1993-<br>May 1994               | 0.000        | 0.268         | 3.29              | 0.00%              | 7.53%               |
| 1993   | Trapped pre-smolts +<br>smolts Sep 1994-Apr 1995 | 0.002        | 0.066         | 3.29              | 0.06%              | 1.97%               |
| 1994   | Trapped parr May 1994-<br>May 1995               | 0.062        | 0.237         | 3.29              | 1.73%              | 6.61%               |
| 1994   | Trapped pre-smolts +<br>smolts Sep 1995-Apr 1996 | 0.099        | 0.000         | 3.29              | 2.92%              | 0.00%               |
| 1998   | Trapped parr May 1998-<br>May 1999               | 0.195        | 0.000         | 3.29              | 5.60%              | 0.00%               |
| 1998   | Trapped pre-smolts +<br>smolts 1998 cohort       | 0.084        | 0.000         | 3.29              | 2.48%              | 0.00%               |
| 1993   | Hatchery controls 0+parr<br>Aug 1993             | 0.055        | 0.000         | 3.29              | 1.65%              | 0.00%               |
| 1993   | Hatchery controls mature<br>0+parr Nov 1993      | 0.144        | 0.427         | 3.29              | 3.72%              | 11.07%              |
| 1993   | Hatchery controls smolts<br>Mar 1994             | 0.225        | 0.127         | 3.29              | 6.19%              | 3.48%               |
| 1994   | Hatchery controls smolts<br>Mar 1995             | 0.000        | 0.000         | 3.29              | 0.00%              | 0.00%               |
