# Supplementary material
Source: PubMed Central journal article supplement (PMC4815444)
Supplement: hdy201529x10.pdf [file hdy201529x10.pdf]

**Supplementary Table 4:** Results of the Fligner-Kileen tests for variance homogeneity in the raw representation data. df = degrees of freedom. P = p-value. Cases where the alternative hypothesis (variances are not equal) is true are highlighted in bold.

| Cohort | Sample                                        | Median chi-square | df       | P            |
|--------|-----------------------------------------------|-------------------|----------|--------------|
| 1993   | Electrofishing Aug 1993 0+parr                | 5.33              | 3        | 0.149        |
| 1994   | Electrofishing Aug 1994 0+parr                | 1.00              | 3        | 0.801        |
| 1994   | Electrofishing Jun 1995 1+parr                | 3.28              | 3        | 0.350        |
| 1998   | Electrofishing Aug 1998 0+parr                | <b>11.65</b>      | <b>4</b> | <b>0.020</b> |
| 1993   | Trapped parr May 1993-May 1994                | <b>11.93</b>      | <b>3</b> | <b>0.008</b> |
| 1993   | Trapped pre-smolts + smolts Sep 1994-Apr 1995 | 1.81              | 3        | 0.613        |
| 1994   | Trapped parr May 1994-May 1995                | 5.35              | 3        | 0.148        |
| 1994   | Trapped pre-smolts + smolts Sep 1995-Apr 1996 | 1.98              | 3        | 0.578        |
| 1998   | Trapped parr May 1998-May 1999                | <b>56.63</b>      | <b>4</b> | <b>0.000</b> |
| 1998   | Trapped pre-smolts + smolts 1998 cohort       | 1.59              | 4        | 0.810        |
| 1993   | Hatchery controls 0+parr Aug 1993             | 3.48              | 3        | 0.323        |
| 1993   | Hatchery controls mature 0+parr Nov 1993      | 3.54              | 3        | 0.315        |
| 1993   | Hatchery controls smolts Mar 1994             | 5.00              | 3        | 0.172        |
| 1994   | Hatchery controls smolts Mar 1995             | 2.09              | 3        | 0.554        |
