# Supplementary material
Source: PubMed Central journal article supplement (PMC4815444)
Supplement: hdy201529x11.pdf [file hdy201529x11.pdf]

**Supplementary Table 5:** Results of the size-at-age LMMs, showing the estimates (+/- standard errors) for the fixed effects and associated *P*-values. †0.1 - 0.05; \* 0.05 – 0.01; \*\* 0.01 – 0.001; \*\*\* <0.001. The WW group in each case is taken as the reference group against which the other groups are tested. The ‘variable and sample’ column provides information on the collection method/environment, time of sampling, life stage sampled and variable measured ( $L_F$  or mass). EF = electrofished. HC = hatchery control. The response variables are on the natural log scale. For details on the random effects for each model, see Table A3.3.

| Cohort | Variable and sample             | Egg size<br>(centred) | Group effects                      |                        |                        |                        |                |
|--------|---------------------------------|-----------------------|------------------------------------|------------------------|------------------------|------------------------|----------------|
|        |                                 |                       | <i>Intercept (WW)</i> <sup>1</sup> | <i>WF</i>              | <i>FW</i>              | <i>FF</i>              |                |
| 1993   | EF Aug 1993 0+parr $L_F$        | 0.01 (0.00)***        | 3.99 (0.02)***                     | 0.05 (0.02)*           | 0.04 (0.03)            | 0.09 (0.02)**          |                |
| 1994   | EF Aug 1994 0+parr $L_F$        | 0.02 (0.00)***        | 3.99 (0.01)***                     | 0.04 (0.01)*           | 0.04 (0.01)*           | 0.05 (0.02)**          |                |
| 1994   | EF Aug 1994 0+parr mass         | 0.06 (0.02)***        | 0.56 (0.03)***                     | 0.08 (0.05)            | 0.10 (0.05)*           | 0.11 (0.05)*           |                |
| 1994   | EF Jun 1995 1+parr $L_F$        | 0.006 (0.006)         | 4.54 (0.13)***                     | 0.03 (0.02)            | 0.05 (0.02)*           | 0.05 (0.02)**          |                |
| 1994   | EF Jun 1995 1+parr mass         | 0.02 (0.02)           | 2.24 (0.04)***                     | 0.08 (0.05)            | 0.14 (0.05)**          | 0.15 (0.05)**          |                |
| 1993   | HC 0+parr Aug 1993 $L_F$        | 0.42 (0.33)           | 4.65 (0.02)***                     | 0.08 (0.03)*           | 0.06 (0.03)            | 0.06 (0.03)*           |                |
| 1993   | HC 0+parr Aug 1993 mass         | 1.52 (1.08)           | 2.61 (0.07)***                     | 0.26 (0.10)*           | 0.19 (0.11)            | 0.21 (0.09)*           |                |
| 1993   | HC mature 0+parr Nov 1993 $L_F$ | 0.30 (0.59)           | 2.60 (0.04)***                     | 0.04 (0.06)            | 0.03 (0.06)            | -0.01 (0.05)           |                |
| 1993   | HC pre-smolts Mar 1994 $L_F$    | 0.40 (0.27)           | 2.82 (0.02)***                     | -0.02 (0.03)           | 0.03 (0.03)            | 0.06 (0.02)*           |                |
| 1993   | HC pre-smolts Mar 1994 mass     | 1.31 (0.80)           | 3.98 (0.06)***                     | -0.04 (0.08)           | 0.09 (0.08)            | 0.16 (0.07)*           |                |
| 1994   | HC pre-smolts Mar 1995 $L_F$    | 0.02 (0.01)*          | 2.59 (0.04)***                     | 0.21 (0.05)***         | 0.14 (0.05)**          | 0.23 (0.05)***         |                |
| 1994   | HC pre-smolts Mar 1995 mass     | 0.06 (0.03).          | 3.24 (0.14)***                     | 0.61 (0.15)***         | 0.42 (0.15)**          | 0.70 (0.15)***         |                |
|        |                                 |                       | <i>Intercept (WW)</i>              | <i>BC<sub>1</sub>W</i> | <i>F<sub>2</sub>Hy</i> | <i>BC<sub>1</sub>F</i> | <i>FF</i>      |
| 1998   | EF Aug 1998 0+parr $L_F$        | 1.48 (0.40)***        | 4.18 (0.01)***                     | 0.01 (0.02)            | 0.04 (0.02)*           | 0.06 (0.02)**          | 0.12 (0.02)*** |
| 1998   | EF Aug 1998 0+parr mass         | 4.25 (1.13)***        | 1.15 (0.03)***                     | 0.02 (0.05)            | 0.10 (0.05)*           | 0.15 (0.05)**          | 0.31 (0.05)*** |

<sup>1</sup> Statistical significance of intercept simply tests whether it is different from zero (for the mean egg size) and as such is not of direct interest
