# Supplementary material
Source: PubMed Central journal article supplement (PMC4815444)
Supplement: hdy201529x12.pdf [file hdy201529x12.pdf]

**Supplementary Table 6:** Results of the model selection procedure to determine the most appropriate random effects structure for the size-at-age LMMs. Five different random effects structures were explored: 1 = unstratified residual variance ( $V_R$ ) only; 2 = common (unstratified) random effect of family ( $V_{FAM}$ ) + common  $V_R$ ; 3 =  $V_{FAM}$  stratified by group + common  $V_R$ ; 4 = common  $V_{FAM}$  +  $V_R$  stratified by group; 5 =  $V_{FAM}$  and  $V_R$  each stratified by group.  $df$  = degrees of freedom associated with each random effects structure. The chosen random effects structure with the lowest Akaike Information Criterion (AIC) in each case is highlighted in bold.

|        |                                                         | AIC for each random effects structure |                                     |                      |                                     |                      |
|--------|---------------------------------------------------------|---------------------------------------|-------------------------------------|----------------------|-------------------------------------|----------------------|
|        |                                                         | 1                                     | 2                                   | 3                    | 4                                   | 5                    |
| Cohort | Sample                                                  |                                       |                                     |                      |                                     |                      |
| 1993   | Electrofishing Aug 1993 0+parr L <sub>F</sub>           | -204.93 ( $df=6$ )                    | <b>-208.06 (<math>df=7</math>)</b>  | -198.81 ( $df=12$ )  | -204.17 ( $df=9$ )                  | -195.16 ( $df=14$ )  |
| 1994   | Electrofishing Aug 1994 0+parr L <sub>F</sub>           | -1017.77 ( $df=6$ )                   | <b>-1026.38 (<math>df=7</math>)</b> | -1017.46 ( $df=12$ ) | -1023.4 ( $df=9$ )                  | -1014.91 ( $df=14$ ) |
| 1994   | Electrofishing Aug 1994 0+parr mass                     | 84.17 ( $df=6$ )                      | <b>71.52 (<math>df=7</math>)</b>    | 80.50 ( $df=12$ )    | 73.46 ( $df=9$ )                    | 81.98 ( $df=14$ )    |
| 1994   | Electrofishing Jun 1995 1+parr L <sub>F</sub>           | -1131.13 ( $df=6$ )                   | -1163.40 ( $df=7$ )                 | -1155.44 ( $df=12$ ) | <b>-1166.61 (<math>df=9</math>)</b> | -1158.73 ( $df=14$ ) |
| 1994   | Electrofishing Jun 1995 1+parr mass                     | 149.91 ( $df=6$ )                     | 116.65 ( $df=7$ )                   | 123.59 ( $df=12$ )   | <b>109.68 (<math>df=9</math>)</b>   | 116.74 ( $df=14$ )   |
| 1998   | Electrofishing Aug 1998 0+parr L <sub>F</sub>           | -495.93 ( $df=7$ )                    | <b>-497.50 (<math>df=8</math>)</b>  | -488.13 ( $df=13$ )  | -495.06 ( $df=10$ )                 | †                    |
| 1998   | Electrofishing Aug 1998 0+parr mass                     | <b>31.84 (<math>df=7</math>)</b>      | 32.83 ( $df=8$ )                    | 42.24 ( $df=13$ )    | 34.82 ( $df=10$ )                   | 43.95 ( $df=15$ )    |
| 1993   | Hatchery controls 0+parr Aug 1993 L <sub>F</sub>        | <b>-143.70 (<math>df=6</math>)</b>    | -141.70 ( $df=7$ )                  | -136.21 ( $df=12$ )  | -142.06 ( $df=9$ )                  | -133.21 ( $df=14$ )  |
| 1993   | Hatchery controls 0+parr Aug 1993 mass                  | <b>64.17 (<math>df=6</math>)</b>      | 66.17 ( $df=7$ )                    | 70.81 ( $df=12$ )    | 65.70 ( $df=9$ )                    | 74.03 ( $df=14$ )    |
| 1993   | Hatchery controls mature 0+parr Nov 1993 L <sub>F</sub> | -120.13 ( $df=6$ )                    | <b>-140.72 (<math>df=7</math>)</b>  | -134.07 ( $df=12$ )  | -139.70 ( $df=9$ )                  | -132.26 ( $df=14$ )  |
| 1993   | Hatchery controls smolts Mar 1994 L <sub>F</sub>        | -389.81 ( $df=6$ )                    | <b>-403.28 (<math>df=7</math>)</b>  | -395.83 ( $df=12$ )  | -400.21 ( $df=9$ )                  | -392.60 ( $df=14$ )  |
| 1993   | Hatchery controls smolts Mar 1994 mass                  | -44.63 ( $df=6$ )                     | <b>-56.62 (<math>df=7</math>)</b>   | †                    | -52.95 ( $df=9$ )                   | †                    |
| 1994   | Hatchery controls smolts Mar 1995 L <sub>F</sub>        | -61.15 ( $df=6$ )                     | -59.52 ( $df=7$ )                   | -58.55 ( $df=12$ )   | <b>-94.28 (<math>df=9</math>)</b>   | †                    |
| 1994   | Hatchery controls smolts Mar 1995 mass                  | 196.96 ( $df=6$ )                     | 198.72 ( $df=7$ )                   | 200.85 ( $df=12$ )   | <b>168.01 (<math>df=9</math>)</b>   | 177.92 ( $df=14$ )   |

† Model did not converge
